# Supplementary material for: Association between rates of caesarean section and maternal and neonatal mortality in the 21st century: a worldwide population‐based ecological study with longitudinal data
Source: PubMed Central journal article supplement — BJOG. 2015 Aug 24;123(5):745–53. doi: 10.1111/1471-0528.13592 (PMC5014131; doi:10.1111/1471-0528.13592), 2015-08-24
Supplement: BJO-123-745-s001.pdf [file BJO-123-745-s001.pdf]

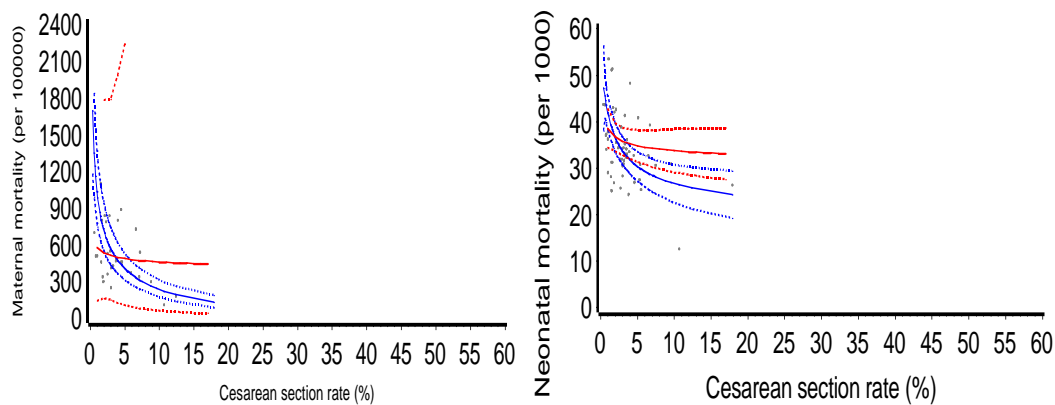

**Figure S1.** Relationship between caesarean section rates and maternal mortality, neonatal mortality with and without adjusting for human development index (HDI) for least developed countries using original data without imputation. Scatterplots and fractional polynomial regression model (estimates and 95% confidence interval). Blue curves: unadjusted models, red curves: adjusted models; solid curves: estimates, dashed curves: 95% CI. (HDI standardized, mean HDI used to fit the curves of the adjusted model)

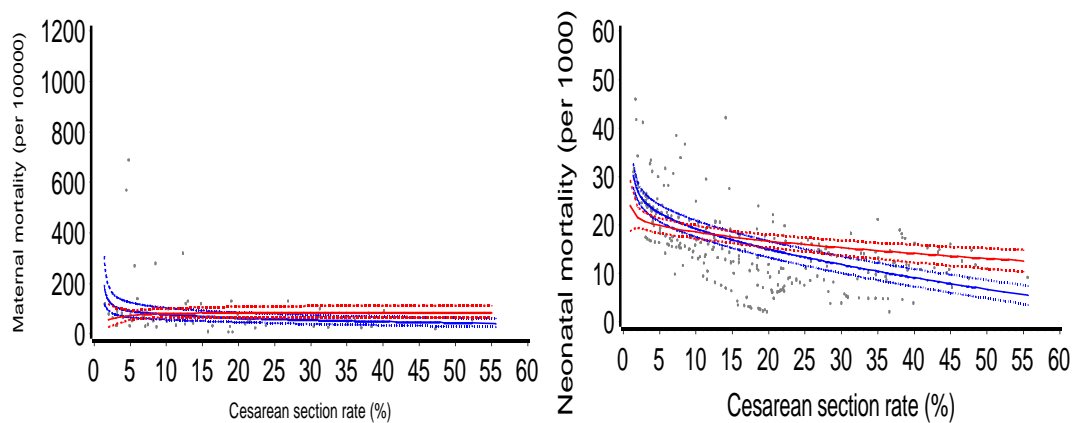

**Figure S2.** Relationship between caesarean section rates and maternal mortality, neonatal mortality with and without adjusting for human development index (HDI) for less developed countries using original data without imputation. Scatterplots and fractional polynomial regression model (estimates and 95% confidence interval). Blue curves: unadjusted models, red curves: adjusted models; solid curves: estimates, dashed curves: 95% CI. (HDI standardized, mean HDI used to fit the curves of the adjusted model)

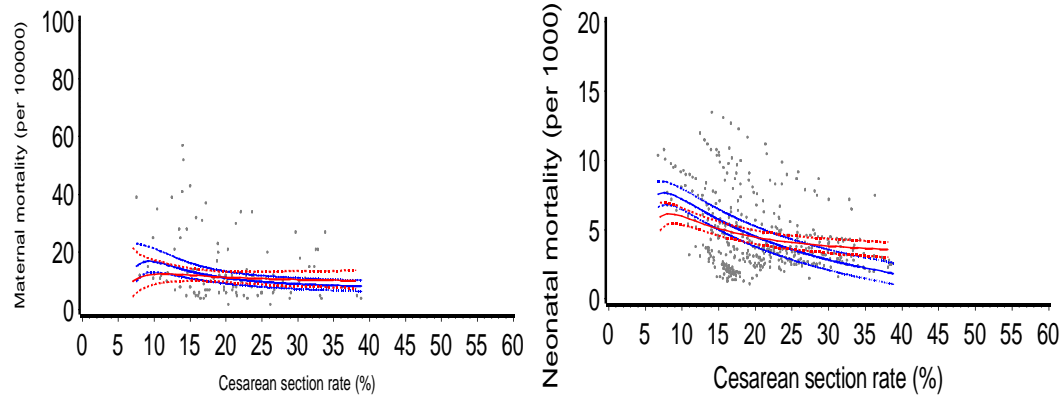

**Figure S3.** Relationship between caesarean section rates and maternal mortality, neonatal mortality with and without adjusting for human development index (HDI) for more developed countries using original data without imputation. Scatterplots and fractional polynomial regression model (estimates and 95% confidence interval). Blue curves: unadjusted models, red curves: adjusted models; solid curves: estimates, dashed curves: 95% CI. (HDI standardized, mean HDI used to fit the curves of the adjusted model)
