# Supplementary material for: Association between rates of caesarean section and maternal and neonatal mortality in the 21st century: a worldwide population‐based ecological study with longitudinal data
Source: PubMed Central journal article supplement — BJOG. 2015 Aug 24;123(5):745–53. doi: 10.1111/1471-0528.13592 (PMC5014131; doi:10.1111/1471-0528.13592), 2015-08-24
Supplement: BJO-123-745-s002.pdf [file BJO-123-745-s002.pdf]

**Table S1.** Cesarean section rates of the first and last observation, the number of cesarean section rates available and the original source by country

| Country     | First year | CS (%) | Latest year | CS (%) | Data points N | Data source (last year)                                                                                                                                                                                                                                                                                                                                                                    |
|-------------|------------|--------|-------------|--------|---------------|--------------------------------------------------------------------------------------------------------------------------------------------------------------------------------------------------------------------------------------------------------------------------------------------------------------------------------------------------------------------------------------------|
| Afghanistan | .          | .      | 2011        | 3.6    | 1             | Central Statistics Organisation (CSO) and UNICEF. Afghanistan Multiple Indicator Cluster Survey 2010-2011: Final Report. Kabul: Central Statistics Organisation (CSO) and UNICEF, 2012.                                                                                                                                                                                                    |
| Albania     | 1992       | 9.3    | 2011        | 30     | 19            | European Health for All database [online database updated on April 2014]. WHO Regional Office for Europe, 2014 ( <a href="http://data.euro.who.int/hfaddb">http://data.euro.who.int/hfaddb</a> , accessed 28 June 2014).                                                                                                                                                                   |
| Algeria     | 1993       | 4.9    | 2000        | 6      | 2             | Ministry de la Santé et de la Population, Office National des Statistiques, Ligue des Etats Arabes. Enquete Algerienne dur la Santé de la Mere et de l'Enfant. Raport Principal. Project Pan Arabe pour le Developpement de l'Enfance. 2001.                                                                                                                                               |
| Argentina   | .          | .      | 2006        | 22.7   | 1             | Sistema Informático Perinatal de la República Argentina. Anuario 2006 de Información Perinatal. Ministerio de Salud Argentina.                                                                                                                                                                                                                                                             |
| Armenia     | 1980       | 0.9    | 2011        | 21.7   | 32            | European Health for All database [online database updated on April 2014]. WHO Regional Office for Europe, 2014 ( <a href="http://data.euro.who.int/hfaddb">http://data.euro.who.int/hfaddb</a> , accessed 28 June 2014).                                                                                                                                                                   |
| Australia   | 1998       | 23     | 2009        | 31.5   | 2             | Li Z, McNally L, Hilder L & Sullivan EA 2011. Australia's mothers and babies 2009. Perinatal statistics series no. 25. Cat. no. PER 52. Sydney: AIHW National Perinatal Epidemiology and Statistics Unit. Available at <a href="http://www.aihw.gov.au/WorkArea/DownloadAsset.aspx?id=10737420980">http://www.aihw.gov.au/WorkArea/DownloadAsset.aspx?id=10737420980</a>                   |
| Austria     | 1981       | 6.5    | 2011        | 28.3   | 20            | European Health for All database [online database updated on April 2014]. WHO Regional Office for Europe, 2014 ( <a href="http://data.euro.who.int/hfaddb">http://data.euro.who.int/hfaddb</a> , accessed 28 June 2014).                                                                                                                                                                   |
| Azerbaijan  | 1990       | 1.42   | 2012        | 16.7   | 23            | European Health for All database [online database updated on April 2014]. WHO Regional Office for Europe, 2014 ( <a href="http://data.euro.who.int/hfaddb">http://data.euro.who.int/hfaddb</a> , accessed 28 June 2014).                                                                                                                                                                   |
| Bahrain     | 1995       | 16     | 2011        | 30     | 2             | Ministry of Health. Health Statistics for 2011. Bahrain, 2012. ( <a href="http://www.moh.gov.bh/PDF/Publications/statistics/HS2013/PDF/Secondary%20Health%20Care/maternity%20hospitals%20(government%20and%20private)_2013.pdf">http://www.moh.gov.bh/PDF/Publications/statistics/HS2013/PDF/Secondary%20Health%20Care/maternity%20hospitals%20(government%20and%20private)_2013.pdf</a> ) |
| Bangladesh  | 1999       | 2.4    | 2011        | 17.9   | 4             | National Institute of Population Research and Training (NIPORT), Mitra and Associates, and ICF International. 2013. Bangladesh Demographic and Health Survey 2011. Dhaka, Bangladesh and Calverton, Maryland, USA: NIPORT, Mitra and Associates, and ICF International.                                                                                                                    |
| Belarus     | 1993       | 9.2    | 2012        | 25.3   | 20            | European Health for All database [online database updated on April 2014]. WHO Regional Office for Europe, 2014 ( <a href="http://data.euro.who.int/hfaddb">http://data.euro.who.int/hfaddb</a> , accessed 28 June 2014).                                                                                                                                                                   |

|                      |      |      |         |      |    |                                                                                                                                                                                                                                                                                                                                                            |
|----------------------|------|------|---------|------|----|------------------------------------------------------------------------------------------------------------------------------------------------------------------------------------------------------------------------------------------------------------------------------------------------------------------------------------------------------------|
| Belgium              | 1980 | 7.4  | 2010    | 19.7 | 21 | European Health for All database [online database updated on April 2014]. WHO Regional Office for Europe, 2014 ( <a href="http://data.euro.who.int/hfadbd">http://data.euro.who.int/hfadbd</a> , accessed 28 June 2014).                                                                                                                                   |
| Belize               | 1991 | 8.4  | 2011    | 28.9 | 3  | Statistical Institute of Belize (SIB) and UNICEF. The Belize Multiple Indicator Cluster Survey (MICS) 2011. SIB and UNICEF: Belize, 2012. <a href="http://www.childinfo.org/files/MICS4_Belize_FinalReport_2011_Eng.pdf">http://www.childinfo.org/files/MICS4_Belize_FinalReport_2011_Eng.pdf</a>                                                          |
| Benin                | 1996 | 2.2  | 2011-12 | 5.4  | 4  | Institut National de la Statistique et de l'Analyse Économique (INSAE) et ICF International, 2013. Enquête Démographique et de Santé du Bénin 2011-2012. Calverton, Maryland, USA : INSAE et ICF International.                                                                                                                                            |
| Bolivia              | 1989 | 7.9  | 2008    | 18.6 | 5  | Demographic Health and Surveys (DHS). Bolivia Encuesta Nacional de Demografía y Salud 2008. Macro International Inc. Calverton, Maryland, USA, 2008.                                                                                                                                                                                                       |
| Bosnia & Herzegovina | 2009 | 17.5 | 2012    | 13.9 | 3  | The Agency for Statistics of Bosnia and Herzegovina, the Federal Ministry of Health, the Ministry of Health and Social Welfare of the Republic of Srpska and the Institute for Public Health of the Federation of Bosnia and Herzegovina. Bosnia and Herzegovina Multiple Indicator Cluster Survey (MICS) 2011–2012, Final Report. Sarajevo: UNICEF, 2013. |
| Botswana             | .    | .    | 2001    | 7.7  | 1  | Ministry of Health. Provisional, Health Statistics report 2001, Botswana. Personal communication from Botana T and Majelantle A, 2003. Information available from Ministry of health upon request.                                                                                                                                                         |
| Brazil               | 1994 | 37.8 | 2012    | 55.6 | 18 | MS/SVS/DASIS - Sistema de Informações sobre Nascidos Vivos - SINASC available at: <a href="http://tabnet.datasus.gov.br/cgi/tabcgi.exe?sinasc/cnv/nvuf.def">http://tabnet.datasus.gov.br/cgi/tabcgi.exe?sinasc/cnv/nvuf.def</a>                                                                                                                            |
| Bulgaria             | 1980 | 4.7  | 2011    | 33.1 | 32 | European Health for All database [online database updated on April 2014]. WHO Regional Office for Europe, 2014 ( <a href="http://data.euro.who.int/hfadbd">http://data.euro.who.int/hfadbd</a> , accessed 28 June 2014).                                                                                                                                   |
| Burkina Faso         | 1993 | 1.3  | 2010    | 1.9  | 4  | Institut National de la Statistique et de la Démographie (INSD) et ICF International, 2012. Enquête Démographique et de Santé et à Indicateurs Multiples du Burkina Faso 2010. Calverton, Maryland, USA : INSD et ICF International.                                                                                                                       |
| Burundi              | .    | .    | 2010    | 4    | 1  | Institut de Statistiques et d'Études Économiques du Burundi (ISTEEBU), Ministère de la Santé Publique et de la Lutte                                                                                                                                                                                                                                       |
| Bhutan               | .    | .    | 2010    | 12.4 | 1  | National Statistics Bureau. Bhutan Multiple Indicator Survey 2010. National Statistics Bureau, Thrimphu, Bhutan, 2011.                                                                                                                                                                                                                                     |

|                          |      |      |           |      |    |                                                                                                                                                                                                                                                                                                                                                                              |
|--------------------------|------|------|-----------|------|----|------------------------------------------------------------------------------------------------------------------------------------------------------------------------------------------------------------------------------------------------------------------------------------------------------------------------------------------------------------------------------|
| Cambodia                 | 2000 | 0.8  | 2010      | 3    | 3  | National Institute of Statistics, Directorate General for Health, and ICF Macro, 2011. Cambodia Demographic and Health Survey 2010. Phnom Penh, Cambodia and Calverton, Maryland, USA: National Institute of Statistics, Directorate General for Health, and ICF Macro.                                                                                                      |
| Cameroon                 | 1991 | 2.4  | 2011      | 3.8  | 4  | Institut National de la Statistique (INS) et ICF. International. 2012. Enquête Démographique et de Santé et à Indicateurs Multiples du Cameroun 2011. Calverton, Maryland, USA : INS et ICF International.                                                                                                                                                                   |
| Canada                   | 1992 | 18.2 | 2011      | 26.9 | 18 | Canadian Institute for Health Information. Giving birth in Canada. A regional profile. Canadian Institute for Health Information, Ottawa, Ontario, 2012.                                                                                                                                                                                                                     |
| Cape Verde               | .    | .    | 2005      | 10.7 | 1  | Instituto Nacional de Estatística (INE) [Cabo Verde], Ministério da Saúde, e Macro International. 2008. Segundo Inquérito Demográfico e de Saúde Reprodutiva, Cabo Verde, IDSR-II, 2005. Calverton, Maryland, USA: INE                                                                                                                                                       |
| Central African Republic | 1994 | 1.9  | 2010      | 4.5  | 2  | ICASEES. Enquête par grappes à indicateurs multiples MICS, RCA 2010 Rapport final. Bangui, RCA ICASEES, 2010. <a href="http://www.childinfo.org/files/MICS4_CAR_FinalReport_2010_Fr.pdf">http://www.childinfo.org/files/MICS4_CAR_FinalReport_2010_Fr.pdf</a>                                                                                                                |
| Chad                     | 1996 | 0.5  | 2010      | 1.5  | 3  | Ministère du Plan, de l'Économie et de la Coopération Internationale. Institut National de la Statistique, des Études Économiques et Démographiques (INSEED), United Nations Population Fund, United Nations Children's Fund. Enquête par grappes à indicateurs multiples-Rapport Final, Tchad, 2012.                                                                        |
| Chile                    | 1990 | 25.4 | 2011      | 38.4 | 22 | Ministerio de Salud de Chile. Gloria Reyes C.                                                                                                                                                                                                                                                                                                                                |
| China                    | 1988 | 3.7  | 2011      | 36.2 | 22 | Qian JC. Analysis on cesarean section rates in China from 2003 to 2011. Population and Development, 2012, 18(5):39-42                                                                                                                                                                                                                                                        |
| Colombia                 | 1990 | 16   | 2011      | 42.8 | 16 | Departamento Administrativo Nacional de Estadística (DANE). Estadísticas Vitales - Nacimientos. Bogotá D.C., Colombia, 2011 (website accessed 29 August 2012. <a href="http://www.dane.gov.co/index.php?option=com_content&amp;view=article&amp;id=786&amp;Itemid=119">http://www.dane.gov.co/index.php?option=com_content&amp;view=article&amp;id=786&amp;Itemid=119</a> ). |
| Comoros                  | 1996 | 5.3  | 2012      | 9.6  | 2  | Direction Générale de la Statistique et de la Prospective (DGSP) et ICF International. 2014. Enquête Démographique et de Santé et à Indicateurs Multiples aux Comores 2012. Rockville, MD 20850, USA: DGSP et ICF International.                                                                                                                                             |
| Congo (Brazzaville)      | .    | .    | 2011-2012 | 5.8  | 1  | Centre Nationale de la Statistique et des Études Économiques (CNSEE) [Congo] et ICF International. 2013 Enquête Démographique et de Santé du Congo (EDSC-II) 2011-2012. Calverton, Maryland, USA: CNSEE et ICF International.                                                                                                                                                |

|                          |      |      |         |      |    |                                                                                                                                                                                                                                         |
|--------------------------|------|------|---------|------|----|-----------------------------------------------------------------------------------------------------------------------------------------------------------------------------------------------------------------------------------------|
| Costa Rica               | 1980 | 15.8 | 2012    | 21.6 | 33 | Caja Costarricense del Seguro Social. Área de Estadística en Salud. San José, Costa Rica (website accessed 14 October 2013). <a href="http://www.ccss.sa.cr/estadisticas_salud_docs">http://www.ccss.sa.cr/estadisticas_salud_docs</a>  |
| Cote d'Ivoire            | 1994 | 1.8  | 2011-12 | 2.7  | 3  | Institut National de la Statistique (INS) et ICF International. 2012. Enquête Démographique et de Santé et à Indicateurs Multiples de Côte d'Ivoire 2011-2012. Calverton, Maryland, USA: INS et ICF International.                      |
| Croatia                  | 1983 | 1.1  | 2012    | 20.2 | 29 | European Health for All database [online database updated on April 2014]. WHO Regional Office for Europe, 2014 ( <a href="http://data.euro.who.int/hfad">http://data.euro.who.int/hfad</a> , accessed 28 June 2014).                    |
| Cuba                     | .    | .    | 2002    | 28.5 | 1  | Dirección Nacional de Estadística. Ministerio de Salud Pública, República de Cuba.                                                                                                                                                      |
| Czech Republic           | 1980 | 4.4  | 2011    | 23.3 | 31 | European Health for All database [online database updated on April 2014]. WHO Regional Office for Europe, 2014 ( <a href="http://data.euro.who.int/hfad">http://data.euro.who.int/hfad</a> , accessed 28 June 2014).                    |
| Dem. Rep. of the Congo   | 2007 | 4    | 2010    | 7.2  | 2  | Institut National de la Statistique, UNICEF. Enquête par grappes a Indicateurs Multiples en République Démocratique du Congo - (MICS-RDC 2010) Rapport Final. République Démocratique du Congo, 2011                                    |
| Dem. People's rep. Korea | .    | .    | 2009    | 12.5 | 1  | Central Bureau of Statistics, UNICEF. Multiple Indicator Cluster Survey 2009. Final Report. Democratic People's Republic of Korea, 2010.                                                                                                |
| Denmark                  | 1980 | 10.4 | 2010    | 20.8 | 31 | WHO/European Regional Office Health for all Database (Internet communication of 4 October 2012 at <a href="http://data.euro.who.int/hfad">http://data.euro.who.int/hfad</a> )                                                           |
| Dominican Republic       | 1996 | 25.9 | 2012    | 43.5 | 5  | Ministerio de Salud Pública. Dirección General de Información y Estadísticas de Salud. Anuario Estadístico de Salud 2012. República Dominicana, 2013.                                                                                   |
| Ecuador                  | 1994 | 17.1 | 2004    | 25.8 | 3  | Center for Studies of Population and Social Development (CEPAR) (Ecuador) and Division of Reproductive Health, Centers for Disease Control and Prevention (CDC). (2005) Ecuador Reproductive Health Survey 2004. Quito, Ecuador: CEPAR. |
| Egypt                    | 1992 | 4.6  | 2008    | 27.6 | 5  | El-Zanaty, Fatma and Ann Way. 2009. Egypt Demographic and Health Survey 2008. Cairo, Egypt: Ministry of Health, El-Zanaty and Associates, and Macro International.                                                                      |
| El Salvador              | 1991 | 13.4 | 2012    | 28.2 | 6  | Ministerio de Salud. Informe de Labores 2012-2013. San Salvador, El Salvador, 2013                                                                                                                                                      |
| Equatorial Guinea        | .    | .    | 2011    | 6.6  | 1  | Ministerio de Sanidad y Bienestar Social, Ministerio de Economía, Planificación e Inversiones Públicas, e ICF International. Encuesta Demográfica y de Salud                                                                            |

|          |      |      |      |      |    |                                                                                                                                                                                                                        |
|----------|------|------|------|------|----|------------------------------------------------------------------------------------------------------------------------------------------------------------------------------------------------------------------------|
|          |      |      |      |      |    | (EDSGE-I) 2011. Calverton, Maryland, USA; 2012.                                                                                                                                                                        |
| Eritrea  | 1995 | 1.6  | 2002 | 2.7  | 2  | National Statistical and Evaluation Office (NSEO) [Eritrea], and ORC Macro.2003. Eritrea Demographic and Health Survey 2002. Calverton, Maryland, USA: National Statistical and Evaluation Office, and ORC Macro.      |
| Estonia  | 1990 | 6.3  | 2011 | 20.2 | 22 | European Health for All database [online database updated on April 2014]. WHO Regional Office for Europe, 2014 ( <a href="http://data.euro.who.int/hfadb">http://data.euro.who.int/hfadb</a> , accessed 28 June 2014). |
| Ethiopia | 2000 | 0.6  | 2011 | 1.5  | 3  | Central Statistical Agency [Ethiopia] and ICF International. 2012. Ethiopia Demographic and Health Survey 2011. Addis Ababa, Ethiopia and Calverton, Maryland, USA: Central Statistical Agency and ICF International.  |
| Fiji     | .    | .    | 2000 | 7.1  | 1  | Personal communication by the Ministry of Health, Fiji, 2003. Information available from Ministry of Health upon request.                                                                                              |
| Finland  | 1982 | 12.7 | 2011 | 14.7 | 29 | European Health for All database [online database updated on April 2014]. WHO Regional Office for Europe, 2014 ( <a href="http://data.euro.who.int/hfadb">http://data.euro.who.int/hfadb</a> , accessed 28 June 2014). |
| France   | 1997 | 16.3 | 2011 | 21   | 13 | European Health for All database [online database updated on April 2014]. WHO Regional Office for Europe, 2014 ( <a href="http://data.euro.who.int/hfadb">http://data.euro.who.int/hfadb</a> , accessed 28 June 2014). |
| Gabon    | 2000 | 5.6  | 2012 | 10   | 2  | Direction Générale de la Statistique (DGS) et ICF International. 2013. Enquête Démographique et de Santé du Gabon 2012. Calverton, Maryland, et Libreville, Gabon : DGS et ICF International.                          |
| Gambia   | .    | .    | 2010 | 2.5  | 1  | The Gambia Bureau of Statistics (GBOS). The Gambia Multiple Indicator Cluster Survey 2010, Final Report. Banjul, The Gambia: The Gambia Bureau of Statistics (GBOS), 2012.                                             |
| Georgia  | 1990 | 3.8  | 2012 | 36.7 | 23 | European Health for All database [online database updated on April 2014]. WHO Regional Office for Europe, 2014 ( <a href="http://data.euro.who.int/hfadb">http://data.euro.who.int/hfadb</a> , accessed 28 June 2014). |
| Germany  | 1990 | 15.7 | 2009 | 30.3 | 20 | WHO/European Regional Office Health for all Database (Internet communication of 4 October 2012 at <a href="http://data.euro.who.int/hfadb">http://data.euro.who.int/hfadb</a> )                                        |
| Ghana    | 1993 | 4.4  | 2011 | 11.4 | 5  | Ghana Statistical Service. Ghana Multiple Indicator Cluster Survey with an Enhanced Malaria Module and Biomarker, 2011, Final Report. Accra, Ghana, 2011                                                               |

|               |      |      |         |      |    |                                                                                                                                                                                                                                                                                                        |
|---------------|------|------|---------|------|----|--------------------------------------------------------------------------------------------------------------------------------------------------------------------------------------------------------------------------------------------------------------------------------------------------------|
| Guatemala     | 1995 | 8.2  | 2008    | 16.3 | 4  | Ministry of Health and Social Assistance (Guatemala), University of Valle (Guatemala) and Division of Reproductive Health, Centers for Disease Control and Prevention (CDC). Guatemala Reproductive Health Survey 2008-2009. Atlanta, United States: Centers for Disease Control and Prevention (CDC). |
| Guinea        | 1992 | 3.3  | 2012    | 2.4  | 4  | Direction Nationale de la Statistique (DNS) (Guinée) et ORC Macro. 2012. Enquête Démographique et de Santé, Guinée 2012. Calverton, Maryland, U.S.A. : DNS et ORC Macro.                                                                                                                               |
| Guinea-Bissau | .    | .    | 2010    | 2.3  | 1  | Ministério da Economia, do Plano e Integração Regional – Direcção Geral do Plano. Inquérito aos Indicadores Múltiplos, Inquérito Demográfico de Saúde Reprodutiva 2010. Relatório Final. Guiné-Bissau, 2011.                                                                                           |
| Guyana        | .    | .    | 2009    | 13.3 | 1  | Ministry of Health (MOH), Bureau of Statistics (BOS), and ICF Macro. 2010. Guyana Demographic and Health Survey 2009. Georgetown, Guyana: MOH, BOS, and ICF Macro.                                                                                                                                     |
| Haiti         | 1994 | 1.6  | 2012    | 5.5  | 4  | Cayemittes, Michel, Michelle Fatuma Busangu, Jean de Dieu Bizimana, Bernard Barrère, Blaise Sévère, Viviane Cayemittes et Emmanuel Charles. 2013. Enquête Mortalité, Morbidité et Utilisation des Services, Haïti, 2012. Calverton, Maryland, USA : MSPP, IHE et ICF International. Photo de           |
| Honduras      | 2001 | 7.9  | 2011-12 | 18.6 | 3  | Secretaría de Salud [Honduras], Instituto Nacional de Estadística (INE) e ICF International. 2013. Encuesta Nacional de Salud y Demografía 2011-2012. Tegucigalpa, Honduras: SS, INE e ICF International.                                                                                              |
| Hungary       | 1994 | 12.6 | 2011    | 33.4 | 18 | European Health for All database [online database updated on April 2014]. WHO Regional Office for Europe, 2014 ( <a href="http://data.euro.who.int/hfadb">http://data.euro.who.int/hfadb</a> , accessed 28 June 2014).                                                                                 |
| Iceland       | 1980 | 7.4  | 2009    | 16.2 | 30 | WHO/European Regional Office Health for all Database (Internet communication of 4 October 2012 at <a href="http://data.euro.who.int/hfadb">http://data.euro.who.int/hfadb</a> )                                                                                                                        |
| India         | 1992 | 2.5  | 2005-06 | 8.5  | 3  | International Institute for Population Sciences (IIPS) and Macro International. 2007. National Family Health Survey (NFHS-3), 2005–06: India: Volume I. Mumbai: IIPS.                                                                                                                                  |
| Indonesia     | 1991 | 1.3  | 2012    | 12.3 | 6  | Statistics Indonesia (Badan Pusat Statistik—BPS), National Population and Family Planning Board (BKKBN), and Kementerian Kesehatan (Kemenkes—MOH), and ICF International. 2013. Indonesia Demographic and Health Survey 2012. Jakarta, Indonesia: BPS, BKKBN, Kemenkes, and ICF International.         |
| Iran          | 2000 | 35   | 2009    | 47.9 | 4  | Bahadori F, Hakimi S, Heidarzade M. The trend of caesarean delivery in the Islamic Republic of Iran. EMHJ. 2013;19(S3):S67-S70.                                                                                                                                                                        |

|                |      |      |         |      |    |                                                                                                                                                                                                                                                                             |
|----------------|------|------|---------|------|----|-----------------------------------------------------------------------------------------------------------------------------------------------------------------------------------------------------------------------------------------------------------------------------|
| Iraq           | 2006 | 20.6 | 2011    | 22.2 | 2  | The Central Statistics Organization and the Kurdistan Regional Statistics Office. Iraq Multiple Indicator Cluster Survey 2011. Final Report. Baghdad, Iraq: The Central Statistics Organization and the Kurdistan Regional Statistics Office, 2012.                         |
| Ireland        | 1981 | 6.2  | 2010    | 26.6 | 27 | European Health for All database [online database updated on April 2014]. WHO Regional Office for Europe, 2014 ( <a href="http://data.euro.who.int/hfad">http://data.euro.who.int/hfad</a> , accessed 28 June 2014).                                                        |
| Israel         | 1987 | 8    | 2011    | 19.8 | 22 | European Health for All database [online database updated on April 2014]. WHO Regional Office for Europe, 2014 ( <a href="http://data.euro.who.int/hfad">http://data.euro.who.int/hfad</a> , accessed 28 June 2014).                                                        |
| Italy          | 1980 | 11.2 | 2011    | 38.1 | 32 | European Health for All database [online database updated on April 2014]. WHO Regional Office for Europe, 2014 ( <a href="http://data.euro.who.int/hfad">http://data.euro.who.int/hfad</a> , accessed 28 June 2014).                                                        |
| Jamaica        | 2002 | 9.6  | 2008    | 14.8 | 2  | Serbanescu F, Ruiz A, Suchdev DB. 2010. Reproductive Health Survey Jamaica 2008: Final Report. Atlanta, GA (USA) and Kingston, Jamaica.                                                                                                                                     |
| Japan          | 1987 | 8.5  | 2011    | 19.2 | 9  | (Ministry of Health, Labour and Welfare. Summary of Health Care Facilities and Hospital Statistics 2011 (平成 23 年 (2011) 医療施設(静態・動態)調査・病院報告の概況).                                                                                                                             |
| Jordan         | 1990 | 5.7  | 2012    | 28   | 5  | Department of Statistics [Jordan] and ICF International. 2013. Jordan Population and Family Health Survey 2012. Calverton, Maryland, USA: Department of Statistics and ICF International.                                                                                   |
| Kazakhstan     | 1983 | 1.5  | 2012    | 15.2 | 30 | European Health for All database [online database updated on April 2014]. WHO Regional Office for Europe, 2014 ( <a href="http://data.euro.who.int/hfad">http://data.euro.who.int/hfad</a> , accessed 28 June 2014).                                                        |
| Kenya          | 1993 | 5.2  | 2008-09 | 6.2  | 4  | Kenya National Bureau of Statistics (KNBS) and ICF Macro. 2010. Kenya Demographic and Health Survey 2008-09. Calverton, Maryland: KNBS and ICF Macro.                                                                                                                       |
| Kyrgyzstan     | 1980 | 0.8  | 2012    | 5.8  | 32 | National Statistical Committee of the Kyrgyz Republic (NSC), Ministry of Health [Kyrgyz Republic], and ICF International. 2013. Kyrgyz epublic Demographic and Health Survey 2012. Bishkek, Kyrgyz Republic, and Calverton, Maryland, USA: NSC, MOH, and ICF International. |
| Lao People Rep | .    | .    | 2010    | 3.7  | 1  | Ministry of Health (MoH), Lao Statistics Bureau (LSB). The Lao Social Indicator Survey LSIS (MICS/DHS) 2011-12 (Multiple Indicator Cluster Survey/Demographic and Health Survey). Ministry of Health and Lao Statistics Bureau, 2012.                                       |

|            |      |      |         |      |    |                                                                                                                                                                                                                                                                                                                                                                                 |
|------------|------|------|---------|------|----|---------------------------------------------------------------------------------------------------------------------------------------------------------------------------------------------------------------------------------------------------------------------------------------------------------------------------------------------------------------------------------|
| Latvia     | 1980 | 4    | 2011    | 23   | 32 | European Health for All database [online database updated on April 2014]. WHO Regional Office for Europe, 2014 ( <a href="http://data.euro.who.int/hfad">http://data.euro.who.int/hfad</a> , accessed 28 June 2014).                                                                                                                                                            |
| Lebanon    | 1995 | 15.1 | 2004    | 23.2 | 3  | Lebanon Health Survey 2004 Report. The Pan Arab Project for Family Health. <a href="http://www.pdslebanon.org/UserFiles/File/Lebanon%20Report%20English(1).pdf">http://www.pdslebanon.org/UserFiles/File/Lebanon%20Report%20English(1).pdf</a>                                                                                                                                  |
| Lesotho    | 2004 | 5.1  | 2009    | 6.7  | 2  | Ministry of Health and Social Welfare (MOHSW) [Lesotho] and ICF Macro. 2010. Lesotho Demographic and Health Survey 2009. Maseru, Lesotho: MOHSW and ICF Macro                                                                                                                                                                                                                   |
| Liberia    | .    | .    | 2007    | 3.5  | 1  | Liberia Institute of Statistics and Geo-Information Services (LISGIS) [Liberia], Ministry of Health and Social Welfare [Liberia], National AIDS Control Program [Liberia], and Macro International Inc. 2008. Liberia Demographic and Health Survey 2007. Monrovia, Liberia: Liberia Institute of Statistics and Geo-Information Services (LISGIS) and Macro International Inc. |
| Lithuania  | 1992 | 8.3  | 2011    | 23.2 | 20 | European Health for All database [online database updated on April 2014]. WHO Regional Office for Europe, 2014 ( <a href="http://data.euro.who.int/hfad">http://data.euro.who.int/hfad</a> , accessed 28 June 2014).                                                                                                                                                            |
| Luxembourg | 1997 | 18.1 | 2011    | 27.4 | 11 | European Health for All database [online database updated on April 2014]. WHO Regional Office for Europe, 2014 ( <a href="http://data.euro.who.int/hfad">http://data.euro.who.int/hfad</a> , accessed 28 June 2014).                                                                                                                                                            |
| Madagascar | 1992 | 1    | 2008-09 | 1.5  | 4  | Institut National de la Statistique (INSTAT) et ICF Macro. 2010. Enquête Démographique et de Santé de Madagascar 2008-2009. Antananarivo, Madagascar : INSTAT et ICF Macro.                                                                                                                                                                                                     |
| Malaysia   | .    | .    | 2006    | 15.7 | 1  | Ravindran J. Rising caesarean section rates in public hospitals in Malaysia 2006. Med J Malaysia, 2008; 63(5):434-5.                                                                                                                                                                                                                                                            |
| Malawi     | 1992 | 3.4  | 2010    | 4.6  | 4  | National Statistical Office (NSO) and ICF Macro. 2011. Malawi Demographic and Health Survey 2010. Zomba, Malawi, and Calverton, Maryland, USA: NSO and ICF Macro.                                                                                                                                                                                                               |
| Maldives   | .    | .    | 2011    | 41.1 | 1  | Ministry of Health. The Maldives Health Statistics 2012. Male, Republic of Maldives; 2013.                                                                                                                                                                                                                                                                                      |



|                      |      |      |         |      |    |                                                                                                                                                                                                                                                                                                                                                                  |
|----------------------|------|------|---------|------|----|------------------------------------------------------------------------------------------------------------------------------------------------------------------------------------------------------------------------------------------------------------------------------------------------------------------------------------------------------------------|
| Mali                 | 1995 | 0.8  | 2006    | 1.6  | 3  | Cellule de Planification et de Statistique du Ministère de la Santé (CPS/MS), Direction Nationale de la Statistique et de l'Informatique du Ministère de l'Économie, de l'Industrie et du Commerce (DNSI/MEIC) et Macro International Inc. 2007. Enquête Démographique et de Santé du Mali 2006. Calverton, Maryland, USA : CPS/DNSI et Macro International Inc. |
| Malta                | 1995 | 18.1 | 2011    | 33.5 | 17 | European Health for All database [online database updated on April 2014]. WHO Regional Office for Europe, 2014 ( <a href="http://data.euro.who.int/hfad">http://data.euro.who.int/hfad</a> , accessed 28 June 2014).                                                                                                                                             |
| Mauritania           | .    | .    | 2000-01 | 3.3  | 1  | Office national de la Statistique (ONS) [Mauritanie] et ORC Macro. 2001. <i>Enquête Démographique et de Santé Mauritanie 2000-2001</i> . Calverton, Maryland, USA: ONS et ORC Macro.                                                                                                                                                                             |
| Mexico               | 1987 | 12.4 | 2012    | 45.2 | 6  | Encuesta Nacional de Salud y Nutrición 2012, Mexico.                                                                                                                                                                                                                                                                                                             |
| Moldova, Republic of | 1980 | 2    | 2012    | 15.8 | 33 | European Health for All database [online database updated on April 2014]. WHO Regional Office for Europe, 2014 ( <a href="http://data.euro.who.int/hfad">http://data.euro.who.int/hfad</a> , accessed 28 June 2014).                                                                                                                                             |
| Mongolia             | .    | .    | 2010    | 21   | 1  | National Statistics Office, UNICEF. Multiple Indicator Cluster Survey 2010 Summary Report, Ulaanbaatar, Mongolia, 2011.                                                                                                                                                                                                                                          |
| Montenegro           | 1997 | 9    | 2010    | 23.6 | 8  | European Health for All database [online database updated on April 2014]. WHO Regional Office for Europe, 2014 ( <a href="http://data.euro.who.int/hfad">http://data.euro.who.int/hfad</a> , accessed 28 June 2014).                                                                                                                                             |
| Morocco              | 1992 | 2    | 2012    | 16   | 4  | Ministère de la Santé, PAFAM. Enquête Nationale sur la Population et la Santé Familiale (ENPSF) 2011. Maroc, 2012.                                                                                                                                                                                                                                               |
| Mozambique           | 1997 | 2.7  | 2011    | 3.9  | 3  | Ministerio da Saude (MISAU), Instituto Nacional de Estatística (INE) e ICF International (ICFI). Moçambique Inquérito Demográfico e de Saúde 2011. Calverton, Maryland, USA: MISAU, INE e ICFI.                                                                                                                                                                  |
| Namibia              | 1992 | 10   | 2006-07 | 12.7 | 2  | Ministry of Health and Social Services (MoHSS) [Namibia] and Macro International Inc. 2008. Namibia Demographic and Health Survey 2006-07. Windhoek, Namibia and Calverton, Maryland, USA: MoHSS and Macro International Inc.                                                                                                                                    |
| Nepal                | 1996 | 1    | 2011    | 4.6  | 4  | Ministry of Health and Population (MOHP) [Nepal], New ERA, and ICF International Inc. 2012. Nepal Demographic and Health Survey 2011. Kathmandu, Nepal: Ministry of Health and Population, New ERA, and ICF International, Calverton, Maryland.                                                                                                                  |

|                  |      |      |         |      |    |                                                                                                                                                                                                                        |
|------------------|------|------|---------|------|----|------------------------------------------------------------------------------------------------------------------------------------------------------------------------------------------------------------------------|
| Netherlands      | 1985 | 6.5  | 2010    | 15.6 | 20 | European Health for All database [online database updated on April 2014]. WHO Regional Office for Europe, 2014 ( <a href="http://data.euro.who.int/hfadb">http://data.euro.who.int/hfadb</a> , accessed 28 June 2014). |
| New Zealand      | 1996 | 20.8 | 2012    | 33.4 | 16 | National Women's Annual Clinical Report 2012 at <a href="http://www.adhb.govt.nz/nwhealthinfo">http://www.adhb.govt.nz/nwhealthinfo</a> p 86                                                                           |
| Nicaragua        | 1998 | 15.4 | 2006    | 19.6 | 3  | Instituto Nacional de Información de Desarrollo (INIDE) Ministerio de Salud (MINSAL). Encuesta Nicaragüense de Demografía y Salud 2006/07. Informe Preliminar. Ministerio de Salud, Nicaragua, 2007.                   |
| Niger            | 1992 | 0.9  | 2012    | 1.4  | 4  | Institut National de la Statistique (INS) et ICF International, 2013. Enquête Démographique et de Santé et à Indicateurs Multiples du Niger 2012. Calverton, Maryland, USA : INS et ICF International.                 |
| Nigeria          | 1990 | 2.9  | 2008    | 1.8  | 4  | National Population Commission (NPC) [Nigeria] and ICF Macro. 2009. Nigeria Demographic and Health Survey 2008. Abuja, Nigeria: National Population Commission and ICF Macro.                                          |
| Norway           | 1980 | 8.4  | 2009    | 17.3 | 30 | WHO/European Regional Office Health for all Database (Internet communication of 4 October 2012 at <a href="http://data.euro.who.int/hfadb">http://data.euro.who.int/hfadb</a> )                                        |
| Oman             | 1995 | 6.6  | 2011    | 17   | 10 | Ministry of Health. Department of Health Information and Statistics, Directorate General of Planning. Annual Health Report 2011. Oman, 2012.                                                                           |
| Pakistan         | 1991 | 2.9  | 2012-13 | 14.1 | 3  | National Institute of Population Studies (NIPS) [Pakistan] and ICF International. 2013. Pakistan Demographic and Health Survey 2012-13. Islamabad, Pakistan, and Calverton, Maryland, USA: NIPS and ICF International. |
| Panama           | .    | .    | 2009    | 20.2 | 1  | Ruth Graciela De León Richardson et al.: Instituto Commemorativo Gorgas de Estudios de la Salud. Panamá Encuesta Nacional de Salud Sexual y Reproductiva 2009 (ENASSER 2009)- Informe Final. Panamá, 2011.             |
| Papua New Guinea |      |      | 2002    | 4.7  | 1  | Papua New Guinea Department of Health. Information provided by Dr Nicholas Mann on 29 July 2003. Papua New Guinea Department of Health, PO Box 807, Waigani NCD, Papua New Guinea.                                     |
| Paraguay         | 1990 | 13   | 2008    | 33.1 | 4  | Paraguay Center for Population Studies (CEPEP). Paraguay Reproductive Health Survey 2008. Asunción, Paraguay: Paraguayan Center for Population Studies (CEPEP).                                                        |
| Peru             | 1991 | 10   | 2011    | 22.9 | 11 | Instituto Nacional de Estadística e Informática and Measure/DHS+ Macro Internacional Inc. Encuesta Demográfica y de Salud Familiar 2011. Lima, Peru, 2012.                                                             |

|                    |      |      |         |      |    |                                                                                                                                                                                                                                                      |
|--------------------|------|------|---------|------|----|------------------------------------------------------------------------------------------------------------------------------------------------------------------------------------------------------------------------------------------------------|
| Philippines        | 1993 | 5.9  | 2011    | 11.1 | 5  | The National Statistics Office (NSO). 2011 Family Health Survey (FHS). NSO: Manila, Philippines, 2012.                                                                                                                                               |
| Poland             | 1994 | 13.8 | 2011    | 29.9 | 8  | European Health for All database [online database updated on April 2014]. WHO Regional Office for Europe, 2014 ( <a href="http://data.euro.who.int/hfad">http://data.euro.who.int/hfad</a> , accessed 28 June 2014).                                 |
| Portugal           | 1980 | 7.1  | 2010    | 36.2 | 30 | WHO/European Regional Office Health for all Database (Internet communication of 4 October 2012 at <a href="http://data.euro.who.int/hfad">http://data.euro.who.int/hfad</a> )                                                                        |
| Republic of Korea  | .    | .    | 2009    | 36.6 | 1  | Korea Institute for Health and Social Affairs. The 2012 National Survey on Fertility, Family Health and Welfare in Korea. Republic of Korea, 2012.                                                                                                   |
| Romania            | 1992 | 7.2  | 2011    | 36.3 | 20 | European Health for All database [online database updated on April 2014]. WHO Regional Office for Europe, 2014 ( <a href="http://data.euro.who.int/hfad">http://data.euro.who.int/hfad</a> , accessed 28 June 2014).                                 |
| Russian Federation | 1990 | 6.7  | 2010    | 22.1 | 18 | European Health for All database [online database updated on April 2014]. WHO Regional Office for Europe, 2014 ( <a href="http://data.euro.who.int/hfad">http://data.euro.who.int/hfad</a> , accessed 28 June 2014).                                 |
| Rwanda             | 1992 | 1.8  | 2010    | 7.1  | 4  | National Institute of Statistics of Rwanda (NISR) [Rwanda], Ministry of Health (MOH) [Rwanda], and ICF International. 2012. Rwanda Demographic and Health Survey 2010. Calverton, Maryland, USA: NISR, MOH, and ICF International                    |
| Samoa              | .    | .    | 2009    | 12.8 | 1  | Ministry of Health [Samoa], Bureau of Statistics [Samoa], and ICF Macro. Samoa Demographic and Health Survey 2009. Apia, Samoa: Ministry of Health, Samoa; 2010.                                                                                     |
| Saudi Arabia       | 1996 | 8.1  | 2010    | 22.3 | 7  | Ministry of Health, General Directorate of Statistics. Health Statistics Book for the year of 2010 (1431). Saudi Arabia, 2010.                                                                                                                       |
| Senegal            | 1992 | 2.3  | 2012-13 | 3.8  | 4  | Agence Nationale de la Statistique et de la Démographie (ANSD) [Sénégal] et ICF International. 2012. Enquête Démographique et de Santé Continue au Sénégal (EDS-Continue) 2012-2013 : Tableaux. Rockville, Maryland, USA: ANSD et ICF International. |
| Serbia             | 2000 | 8    | 2012    | 26.8 | 13 | European Health for All database [online database updated on April 2014]. WHO Regional Office for Europe, 2014 ( <a href="http://data.euro.who.int/hfad">http://data.euro.who.int/hfad</a> , accessed 28 June 2014).                                 |
| Sierra Leone       | 2008 | 1.5  | 2010    | 4.5  | 2  | Statistics Sierra Leone and UNICEF-Sierra Leone. Sierra Leone Multiple Indicator Cluster Survey 2010, Final Report. Freetown, Sierra Leone: Statistics Sierra Leone and UNICEF-Sierra Leone, 2011.                                                   |

|                 |      |      |      |      |    |                                                                                                                                                                                                                                                 |
|-----------------|------|------|------|------|----|-------------------------------------------------------------------------------------------------------------------------------------------------------------------------------------------------------------------------------------------------|
| Slovakia        | 1985 | 6.3  | 2009 | 24.6 | 23 | European Health for All database [online database updated on April 2014]. WHO Regional Office for Europe, 2014 ( <a href="http://data.euro.who.int/hfad">http://data.euro.who.int/hfad</a> , accessed 28 June 2014).                            |
| Slovenia        | 1981 | 5.2  | 2011 | 19.6 | 31 | European Health for All database [online database updated on April 2014]. WHO Regional Office for Europe, 2014 ( <a href="http://data.euro.who.int/hfad">http://data.euro.who.int/hfad</a> , accessed 28 June 2014).                            |
| Solomon Islands | .    | .    | 2007 | 6.2  | 1  | National Statistics Office, Secretariat of the Pacific Community, Macro International Inc. Solomon Islands Demographic and Health Survey 2006-2007. Secretariat of the Pacific Community, Noumea, New Caledonia; 2009.                          |
| South Africa    | 1998 | 15.5 | 2003 | 20.6 | 2  | Department of Health, Medical Research Council, OrcMacro. 2007. South Africa Demographic and Health Survey 2003. Pretoria: Department of Health.                                                                                                |
| Spain           | 1983 | 8.6  | 2011 | 24.9 | 29 | European Health for All database [online database updated on April 2014]. WHO Regional Office for Europe, 2014 ( <a href="http://data.euro.who.int/hfad">http://data.euro.who.int/hfad</a> , accessed 28 June 2014).                            |
| Sri Lanka       | 2007 | 23.8 | 2008 | 25.7 | 2  | Ministry of Health. Annual Health Bulletin 2008, Sri Lanka, 2009.                                                                                                                                                                               |
| Sudan           | 1993 | 3.7  | 2010 | 6.6  | 3  | Federal Ministry of Health and Central Bureau of Statistics. Sudan Household and Health Survey - 2, 2012, National report. Khartoum, Republic of Sudan: Federal Ministry of Health and Central Bureau of Statistics, 2012.                      |
| Suriname        | .    | .    | 2010 | 19   | 1  | Ministry of Social Affairs and Housing and General Bureau of Statistics. Suriname Multiple Indicator Cluster Survey 2010, Final Report: Paramaribo, Suriname, 2012.                                                                             |
| Swaziland       | 2006 | 7.9  | 2010 | 12.3 | 2  | Central Statistical Office, UNICEF. Swaziland Multiple Indicator Cluster Survey 2010. Final Report. Mbabane, Swaziland: Central Statistical Office, UNICEF, 2011.                                                                               |
| Sweden          | 1980 | 11.5 | 2011 | 16.2 | 31 | European Health for All database [online database updated on April 2014]. WHO Regional Office for Europe, 2014 ( <a href="http://data.euro.who.int/hfad">http://data.euro.who.int/hfad</a> , accessed 28 June 2014).                            |
| Switzerland     | 1983 | 18   | 2009 | 32.2 | 20 | WHO/European Regional Office Health for all Database (Internet communication of 4 October 2012 at <a href="http://data.euro.who.int/hfad">http://data.euro.who.int/hfad</a> )                                                                   |
| Syria           | .    | .    | 2000 | 14.8 | 1  | Jurdi R,Khawaja M. Caesarean section rates in the Arab Region: a cross-national study. Health Policy Plan. 2004 March ; 19(2): 101–110                                                                                                          |
| Tajikistan      | 1990 | 1.9  | 2012 | 4    | 22 | Statistical Agency under the President of the Republic of Tajikistan (SA), Ministry of Health [Tajikistan], and ICF International. 2013. Tajikistan Demographic and Health Survey 2012. Dushanbe, Tajikistan, and Calverton, Maryland, USA: SA, |

MOH, and ICF International.

|                                           |      |      |         |       |    |                                                                                                                                                                                                                                                                                               |
|-------------------------------------------|------|------|---------|-------|----|-----------------------------------------------------------------------------------------------------------------------------------------------------------------------------------------------------------------------------------------------------------------------------------------------|
| Thailand                                  | 2001 | 17.4 | 2009    | 24.3  | 2  | Personal communication from Voramongkol N, MCH Division Bureau of health Promotion, Department of Health, Ministry of Public Health, Nontaburi, Thailand, 2003. Information available from Ministry of Public Health upon request.                                                            |
| The former Yugoslav Republic of Macedonia | 1995 | 1.4  | 2010    | 22.17 | 13 | WHO/European Regional Office Health for all Database (Internet communication of 4 October 2012 at <a href="http://data.euro.who.int/hfadb">http://data.euro.who.int/hfadb</a> )                                                                                                               |
| Timor-Leste                               | .    | .    | 2009-10 | 1.7   | 1  | National Statistics Directorate (NSD) [Timor-Leste], Ministry of Finance [Timor-Leste], and ICF Macro. 2010. Timor-Leste Demographic and Health Survey 2009-10. Dili, Timor-Leste: NSD [Timor-Leste] and ICF Macro                                                                            |
| Togo                                      | 1998 | 2    | 2010    | 8.8   | 2  | Direction Générale de la Statistique et de la Comptabilité Nationale (DGSCN). Enquête par grappes à indicateurs multiples MICS Togo, 2010, Rapport final. Togo, 2012.                                                                                                                         |
| Trinidad & Tobago                         | .    | .    | 2007    | 18.4  | 1  | Mungrue K, Nixon C, David Y, Dookwah D, Durga S, Greene K, Mohammed H. Trinidadian women's knowledge, perceptions, and preferences regarding cesarean section: How do they make choices? Int J Womens Health. 2010;2:387–391.                                                                 |
| Tunisia                                   | 1995 | 8    | 2012    | 26.7  | 2  | Ministère du Développement et de la Coopération Internationale, MDCI - Institut National de la Statistique et Fonds des Nations Unies pour l'Enfance. Suivi de la situation des enfants et des femmes en Tunisie- Enquête par grappes à indicateurs multiples 2011-2012, Rapport Final, 2013. |
| Turkey                                    | 1993 | 8    | 2011    | 47.5  | 7  | European Health for All database [online database updated on April 2014]. WHO Regional Office for Europe, 2014 ( <a href="http://data.euro.who.int/hfadb">http://data.euro.who.int/hfadb</a> , accessed 28 June 2014).                                                                        |
| Turkmenistan                              | 1991 | 3    | 2012    | 6.6   | 20 | European Health for All database [online database updated on April 2014]. WHO Regional Office for Europe, 2014 ( <a href="http://data.euro.who.int/hfadb">http://data.euro.who.int/hfadb</a> , accessed 28 June 2014).                                                                        |
| Uganda                                    | 1995 | 2.6  | 2011    | 5.3   | 4  | Uganda Bureau of Statistics (UBOS) and ICF International Inc. 2012. Uganda Demographic and Health Survey 2011. Kampala, Uganda: UBOS and Calverton, Maryland: ICF International Inc.                                                                                                          |
| Ukraine                                   | 1980 | 1.47 | 2012    | 15.8  | 33 | European Health for All database [online database updated on April 2014]. WHO Regional Office for Europe, 2014 ( <a href="http://data.euro.who.int/hfadb">http://data.euro.who.int/hfadb</a> , accessed 28                                                                                    |

|                             |      |      |         |      |    |                                                                                                                                                                                                                                                                      |
|-----------------------------|------|------|---------|------|----|----------------------------------------------------------------------------------------------------------------------------------------------------------------------------------------------------------------------------------------------------------------------|
|                             |      |      |         |      |    | June 2014).                                                                                                                                                                                                                                                          |
| United Arab Emirates        | 1995 | 15.8 | 2007    | 20.7 | 2  | Ministry of Health. Statistics 2007. Abu Dhabi, United Arab Emirates, 2008.                                                                                                                                                                                          |
| United Kingdom              | 1980 | 8.2  | 2011    | 24.1 | 22 | European Health for All database [online database updated on April 2014]. WHO Regional Office for Europe, 2014 ( <a href="http://data.euro.who.int/hfad">http://data.euro.who.int/hfad</a> , accessed 28 June 2014).                                                 |
| United Republic of Tanzania | 1996 | 2.1  | 2010    | 4.5  | 4  | National Bureau of Statistics (NBS) [Tanzania] and ICF Macro. 2011. Tanzania Demographic and Health Survey 2010. Dar es Salaam, Tanzania: NBS and ICF Macro                                                                                                          |
| United States of America    | 1989 | 22.8 | 2010    | 32.8 | 22 | Martin JA, Hamilton BE, Ventura SJ, Osterman JK, Wilson EC, Mathews TJ. Births: Final Data for 2010. National Vital Statistics Reports, 2012;61(1).                                                                                                                  |
| Uruguay                     | 2000 | 23.8 | 2012    | 39.9 | 2  | Ministerio de Salud Pública, Dirección General de la Salud, División Epidemiología, Estadísticas Vitales, 2014 ( <a href="http://www.msp.gub.uy/">http://www.msp.gub.uy/</a> ) accessed on June 30 2014                                                              |
| Uzbekistan                  | 1995 | 1.9  | 2012    | 10.5 | 18 | European Health for All database [online database updated on April 2014]. WHO Regional Office for Europe, 2014 ( <a href="http://data.euro.who.int/hfad">http://data.euro.who.int/hfad</a> , accessed 28 June 2014).                                                 |
| Venezuela                   | 2002 | 25.1 | 2009    | 32.2 | 2  | Ministerio del Poder Popular para la Salud (MPPS). Anuario Estadístico 2009. Venezuela, 2010.                                                                                                                                                                        |
| Viet Nam                    | 1997 | 3.4  | 2011    | 20   | 3  | General Statistical Office (GSO), Viet Nam Multiple Indicator Cluster Survey - Final Report, 2011, Ha Noi, Viet Nam, 2011.                                                                                                                                           |
| Yemen                       | 1997 | 1.4  | 2009    | 6.5  | 2  | Ministry of Health and Population. Yemen Annual Statistical Health Report 2009. Sana'a, Yemen: Ministry of Health and Population, 2010.                                                                                                                              |
| Zambia                      | 1992 | 2.6  | 2007    | 3    | 4  | Central Statistical Office (CSO), Ministry of Health (MOH), Tropical Diseases Research Centre (TDRC), University of Zambia, and Macro International Inc. 2009. Zambia Demographic and Health Survey 2007. Calverton, Maryland, USA: CSO and Macro International Inc. |
| Zimbabwe                    | 1994 | 6    | 2010-11 | 4.5  | 4  | Zimbabwe National Statistics Agency (ZIMSTAT) and ICF International. 2012. Zimbabwe Demographic and Health Survey 2010-11. Calverton, Maryland: ZIMSTAT and ICF International Inc                                                                                    |

**Table S2.** Fractional polynomial regression models fitted for the relationship between cesarean section rates (CSR) and mortality outcomes<sup>a,b</sup>

|                                    | Maternal mortality ratio (MMR) <sup>c</sup>                                                           | Neonatal mortality rate (NMR) <sup>d</sup>                                              |
|------------------------------------|-------------------------------------------------------------------------------------------------------|-----------------------------------------------------------------------------------------|
| <b>Unadjusted models</b>           |                                                                                                       |                                                                                         |
| Least developed                    | $MMR = \text{EXP}(5.20 + 1.54 * CSR^{-1} + 1.11 * CSR^{-1} * \text{LOG}(CSR))$                        | $NMR = 9.83 - 19.22 * CSR^{-1} + 53.15 * CSR^{-0.5}$                                    |
| Less developed                     | $MMR = \text{EXP}(2.40 + 2.31 * CSR^{-0.5} + 2.12 * CSR^{-0.5} * \text{LOG}(CSR))$                    | $NMR = 27.90 - 3.63 * CSR^{-0.5} - 3.07 * CSR^{0.5}$                                    |
| More developed                     | $MMR = \text{EXP}(1.89 - 268.81 * CSR^{-2} + 156.30 * CSR^{-2} * \text{LOG}(CSR))$                    | $NMR = -6.14 - 259.38 * CSR^{-2} + 50.20 * CSR^{-0.5}$                                  |
| <b>Adjusted models<sup>e</sup></b> |                                                                                                       |                                                                                         |
| Least developed                    | $MMR = \text{EXP}(6.11 - 0.27 * CSR^{-2} + 0.69 * CSR^{-1} - 0.50 * \text{HDI})$                      | $NMR = 34.46 + 7.30 * CSR^{-1} + 5.17 * CSR^{-1} * \text{LOG}(CSR) - 9.71 * \text{HDI}$ |
| Less developed                     | $MMR = \text{EXP}(4.83 + 0.38 * CSR^{-2} - 2.59 * CSR^{-2} * \text{LOG}(CSR) - 0.80 * \text{HDI})$    | $NMR = 20.61 + 2.77 * CSR^{-0.5} - 0.12 * CSR - 6.50 * \text{HDI}$                      |
| More developed                     | $MMR = \text{EXP}(2.37 - 120.78 * CSR^{-2} + 55.67 * CSR^{-2} * \text{LOG}(CSR) - 0.40 * \text{HDI})$ | $NMR = 2.06 - 273.35 * CSR^{-2} + 68.54 * CSR^{-1} - 1.84 * \text{HDI}$                 |

<sup>a</sup>Fixed effects of mixed models

<sup>b</sup>Cesarean section rate (%)

<sup>c</sup>Maternal mortality ratio (per 100,000 live births)

<sup>d</sup>Neonatal mortality rate (per 1000 live births)

<sup>e</sup>Adjusted for HDI (standardized).

**Table S3.** Predicted mortality rates based on the fixed effects of mixed models fitted to the relationship between cesarean section rates and mortality outcomes

| Cesarean section rates (CSR) <sup>a</sup> | Maternal mortality ratio (MMR) <sup>b</sup> |                       | Neonatal mortality rate (NMR) <sup>c</sup> |                       |
|-------------------------------------------|---------------------------------------------|-----------------------|--------------------------------------------|-----------------------|
|                                           | Unadjusted                                  | Adjusted <sup>d</sup> | Unadjusted                                 | Adjusted <sup>d</sup> |
| <b>Least developed</b>                    |                                             |                       |                                            |                       |
| 1                                         | 842.3 (699.3, 1014.5)                       | 681.9 (592.4, 785.1)  | 43.8 (40.7, 46.8)                          | 41.8 (39.5, 44.0)     |
| 5                                         | 351.4 (292.9, 421.5)                        | 510.2 (444.2, 586.0)  | 29.8 (26.9, 32.7)                          | 37.6 (35.2, 39.9)     |
| 10                                        | 272.0 (226.0, 327.3)                        | 480.1 (415.4, 554.9)  | 24.7 (21.7, 27.7)                          | 36.4 (33.9, 38.9)     |
| 15                                        | 244.5 (202.7, 294.8)                        | 469.8 (405.4, 544.5)  | 22.3 (19.2, 25.4)                          | 35.9 (33.3, 38.4)     |
| 20 <sup>e</sup>                           | .                                           | .                     | .                                          | .                     |
| 25 <sup>e</sup>                           | .                                           | .                     | .                                          | .                     |
| 30 <sup>e</sup>                           | .                                           | .                     | .                                          | .                     |
| <b>Less developed</b>                     |                                             |                       |                                            |                       |
| 1                                         | 110.5 (80.8, 151)                           | 183.1 (70.8, 473.3)   | 28.5 (26.2, 30.8)                          | 23.3 (21.3, 25.2)     |
| 5                                         | 141.6 (111.6, 179.7)                        | 107.8 (92.3, 125.8)   | 22.7 (20.9, 24.4)                          | 21.2 (20.0, 22.5)     |
| 10                                        | 106.5 (84.6, 134.2)                         | 118.6 (101.9, 138.0)  | 19.3 (17.6, 21.1)                          | 20.3 (19.1, 21.5)     |
| 15                                        | 87.6 (69.7, 110.3)                          | 121.8 (104.2, 142.3)  | 16.9 (15.2, 18.7)                          | 19.5 (18.3, 20.8)     |
| 20                                        | 76.0 (60.3, 95.8)                           | 123.1 (105.2, 144.2)  | 15.0 (13.3, 16.7)                          | 18.8 (17.6, 20.1)     |
| 25                                        | 68.1 (53.9, 86.1)                           | 123.8 (105.6, 145.2)  | 13.3 (11.5, 15.0)                          | 18.2 (16.9, 19.5)     |
| 30                                        | 62.4 (49.2, 79.0)                           | 124.2 (105.9, 145.8)  | 11.7 (10.0, 13.5)                          | 17.5 (16.2, 18.9)     |
| <b>More developed</b>                     |                                             |                       |                                            |                       |
| 1 <sup>e</sup>                            | .                                           | .                     | .                                          | .                     |
| 5 <sup>e</sup>                            | .                                           | .                     | .                                          | .                     |
| 10                                        | 16.5 (13.0, 20.9)                           | 11.5 (9.0, 14.8)      | 7.1 (6.4, 7.9)                             | 6.2 (5.6, 6.7)        |
| 15                                        | 13.2 (10.8, 16.0)                           | 12.2 (10.4, 14.4)     | 5.7 (4.9, 6.4)                             | 5.4 (4.9, 5.9)        |
| 20                                        | 10.9 (9.1, 13.1)                            | 12.0 (10.3, 14.0)     | 4.4 (3.7, 5.2)                             | 4.8 (4.3, 5.3)        |
| 25                                        | 9.6 (7.9, 11.7)                             | 11.8 (9.9, 13.9)      | 3.5 (2.8, 4.2)                             | 4.4 (3.9, 4.9)        |
| 30                                        | 8.9 (7.2, 10.9)                             | 11.6 (9.5, 14.0)      | 2.7 (2.0, 3.5)                             | 4.0 (3.5, 4.6)        |

<sup>a</sup>Cesarean section rate (%)

<sup>b</sup>Maternal mortality ratio (per 100,000 live births)

<sup>c</sup>Neonatal mortality rate (per 1,000 live births)

<sup>d</sup>Adjusted for HDI (HDI standardized, mean HDI was set at 0 and used to obtain predicted values)

<sup>e</sup>Outside of data range
